# Supplementary material for: Isovalent cation substitution drives structural transformation and infrared nonlinear optical activity in Eu-based chalcogenides
Source: Royal Society of Chemistry journal article supplement (doi:10.1039/d4qi03346a), 2025-01-01
Supplement: d4qi03346a1.pdf [file d4qi03346a1.pdf]

**Electronic Supplementary Information (ESI)**  
**Isovalent cation substitution drives structural**  
**transformation and infrared nonlinear optical activity in**  
**Eu-based chalcogenides**

Ping Feng,<sup>‡a,b,c,d</sup> Sheng-Hua Zhou,<sup>‡b,c,e</sup> Mao-Yin Ran,<sup>b,c</sup> Bingxuan Li,<sup>b,c</sup> Xin-Tao

Wu,<sup>b,c</sup> Hua Lin,<sup>\*,a,b,c,d</sup> and Qi-Long Zhu<sup>\*,a,b,c,d</sup>

*<sup>a</sup>College of Chemistry, Fuzhou University, Fuzhou 350002, China*

*<sup>b</sup>Fujian Science & Technology Innovation Laboratory for Optoelectronic Information of China, Fuzhou 350108, China*

*<sup>c</sup>State Key Laboratory of Structural Chemistry, Fujian Institute of Research on the Structure of Matter, Chinese Academy of Sciences, Fuzhou 350002, China*

*<sup>d</sup>Fujian College, University of Chinese Academy of Sciences, Fuzhou 350002, China*

*<sup>e</sup>Resource environment & Clean energy Laboratory, School of Chemistry and Chemical Engineering, Jiangsu University of Technology, Jiangsu 213001, China*

<sup>‡</sup> P. Feng and S. H. Zhou contributed equally to this work.

*\*E-mail: [linhua@fjirsm.ac.cn](mailto:linhua@fjirsm.ac.cn) and [qlzhu@fjirsm.ac.cn](mailto:qlzhu@fjirsm.ac.cn)*

# Electronic Supplementary Information (ESI)

## Table of Contents

### 1 Experimental Section

1.1 Materials and Instruments

1.2 Synthesis

1.3 Single-Crystal Structure determination

1.4 Second-Harmonic Generation (SHG) Measurements

1.5 Laser Induced Damage Threshold (LIDT) Measurements

### 2 Computational Details

### 3 Figures and Tables

**Figure S1.** EDX results of  $\beta$ -EuZnGeS<sub>4</sub>.

**Figure S2.** UV–vis–NIR diffuse reflectance spectrum of Eu<sub>2</sub>GeS<sub>4</sub>.

**Figure S3.** Plot of band gap energies in eV as a function of cell volumes in Å<sup>3</sup> for the members of the X<sup>II</sup>-M<sup>II</sup>-M<sup>IV</sup>-Q<sub>4</sub> family with the space group *Fdd2*.

**Figure S4.** Crystal photo and powder XRD data of the  $\beta$ -EuZnGeS<sub>4</sub> compound stored for over 6 months.

**Figure S5.** Coordination environment of (a) Eu1 and (b) Eu2 in ternary Eu<sub>2</sub>GeS<sub>4</sub>.

**Figure S6.** Coordination environment of (a) Eu1, (b) Eu2 and (c) Eu3 in quaternary  $\beta$ -EuZnGeS<sub>4</sub>.

**Figure S7.** Calculated birefringence ( $\Delta n$ ) of  $\beta$ -EuZnGeS<sub>4</sub>.

**Table S1.** Crystal data and structural refinement details for  $\beta$ -EuZnGeS<sub>4</sub>.

**Table S2.** Atomic coordinates, equivalent isotropic displacement parameters and bond valence sums (BVS) for of  $\beta$ -EuZnGeS<sub>4</sub>.

**Table S3.** Selected bond lengths (Å) and angle (°) of  $\beta$ -EuZnGeS<sub>4</sub>.

## Electronic Supplementary Information (ESI)

**Table S4.** The  $\Delta d$  (Å) and  $\Delta\theta$  (deg) for the  $X^{II}$ - $M^{II}$ - $M^{IV}$ - $Q_4$  ( $X^{II}$  = Eu, Sr, Ba;  $M^{II}$  = Zn, Cd, Hg;  $M^{IV}$  = Si, Ge, Sn; Q = S, Se) family.

### 4 References

# Electronic Supplementary Information (ESI)

## 1 Experimental Section

### 1.1 Materials and Instruments

All reagents used in the present experiments were purchased from commercial sources and directly used without further purification. All weighing processes were completed in an anhydrous and oxygen-free glove box. The semi-quantitative energy dispersive X-ray (EDX, Oxford INCA) spectra were measured with a field emission scanning electron microscope (FESEM, JSM6700F). Powder X-ray diffraction (PXRD) analysis was carried out in a Rigaku Mini-Flex II powder diffractometer (Cu- $K_{\alpha}$ ,  $\lambda = 1.5418 \text{ \AA}$ ). UV-vis-NIR absorption measurement was performed in the region of 200–2500 nm at room temperature using an UV-vis-NIR spectrometer (Perkin-Elmer Lambda 950). The reflectance spectrum of the BaSO<sub>4</sub> powder was collected as the baseline and the diffuse reflectance data were converted to absorbance internally by the instrument by use of the Kubelka-Munk function.<sup>1</sup> The IR transmittance of the single-crystal sample was measured using the PerkinElmer Spectrum One FT-IR Spectrometer, within the range of 400–4000 cm<sup>-1</sup>. The thermal stability analyses were measured on a NETZSCH STA 449C simultaneous analyser.

### 1.2 Synthesis

All reactants were stored and processed in a glove box filled with high-purity argon. To prepare  $\beta$ -EuZnGeS<sub>4</sub> crystals, the following materials—Eu<sub>2</sub>O<sub>3</sub> powder (4N, Aladdin), Zn powder (4N, Aladdin), Ge powder (5N, Aladdin), S powder (4N, Aladdin), and B powder (4N, Aladdin)—were carefully weighed according to the stoichiometric ratio, resulting in a total mass of 500 mg. Elemental B in the reactive system acts as a reducing agent due to its strong affinity for oxygen. It not only extracts oxygen from metal oxides (e.g., Eu<sub>2</sub>O<sub>3</sub>) but also helps prevent the detrimental

## Electronic Supplementary Information (ESI)

effects of air, water, and silica tubes on the synthesis process. The powders were then ground, pressed into tablets, and placed in a quartz crucible. The crucible was flame-sealed under a vacuum of  $10^{-4}$  Torr and placed in a computer-controlled muffle furnace. The heating procedure was as follows: the temperature was gradually increased to 1173 K over 50 hours and held at that temperature for 100 hours. Afterward, the furnace was cooled at a rate of 4 K/h, and the tube furnace was shut off once the temperature dropped to 573 K, allowing it to cool naturally to room temperature. The resulting target crystals were red-brown in color and were rinsed with distilled water and ethanol. The synthesized compound retained its weight and color at room temperature for over six months, demonstrating its excellent physical and chemical stability.

### 1.3 Single-Crystal Structure determination

Taking the high-quality crystal of  $\beta$ -EuZnGeS<sub>4</sub> with suitable sizes was selected for single-crystal X-ray diffraction (XRD) analysis. The single-crystal diffraction data collections were collected on a Saturn 724 install with graphite-monochromated Mo- $K_{\alpha}$  radiation ( $\lambda = 0.71073$  Å) at room temperature. The absorption correction was performed by the multi-scan method.<sup>2</sup> Using direct methods and making further refinement by full-matrix least-square fitting on  $F^2$  based on *SHELX-2014* software, the precise structure was determined successfully.<sup>3</sup> The atomic coordinates and equivalent isotropic displacement parameters are given in the Tables S1 and S2. Bond distances (Å) and bond angles (°) of RbPbPS<sub>4</sub> are listed in Table S3. CIF of  $\beta$ -EuZnGeS<sub>4</sub> has been submitted with CCDC number 2385100.

## Electronic Supplementary Information (ESI)

### 1.4 Second-Harmonic Generation (SHG) Measurements

The powder SHG property test was investigated by Kurtz-Perry method<sup>4</sup> using a Q-switched laser radiation. The laser radiation at 2900 nm was selected as the laser sources with the laser energy of 10 mJ and AgGaS<sub>2</sub> were measured as the benchmark, respectively. Samples of  $\beta$ -EuZnGeS<sub>4</sub> and AgGaS<sub>2</sub> were ground and sieved into different granule sizes (30–46, 46–74, 74–106, 106–150, and 150–210  $\mu$ m) for the phase matching measurements. The frequency-doubled output signals were detected via photomultiplier tube and oscilloscope.

### 1.5 Laser Induced Damage Threshold (LIDT) Measurements

The LIDT of  $\beta$ -EuZnGeS<sub>4</sub> at the maximal scope of 150–210  $\mu$ m was carried out single pulse measurement method<sup>5</sup> and similar scope of AgGaS<sub>2</sub> single crystal used to the reference. The whole measuring materials were foist into selfsame plastic holders (thickness: 1 mm and diameter: 8 mm), respectively. Using an optical microscope monitor the exterior change of sample under the 1064 nm laser radiation with pulse width  $\tau_p$  of 10 ns. Nova II sensor with a PE50-DIF-C energy sensor and a Vernier caliper was used for measuring the power of laser beam and the damage spot radius.

## 2 Computational Details

The DFT calculations have been performed using the *Vienna ab initio simulation package* (VASP)<sup>6–8</sup> with the Perdew-Burke-Ernzerhof (PBE)<sup>9</sup> exchange correlation functional. The projected augmented wave (PAW)<sup>10</sup> potentials with the valence states 6s, 6p and 4f for Eu, 4s, 4p and 3d for Zn, 4s and 4p for Ge, and 3s and 3p for S, respectively, have been used. A  $\Gamma$ -centered  $7 \times 7 \times 5$  Monkhorst-Pack grid for the Brillouin zone sampling<sup>11</sup> and a cutoff energy of 750 eV for the plane wave expansion

## Electronic Supplementary Information (ESI)

were found to get convergent lattice parameters. The linear and nonlinear optical calculation was performed in the condition of a Monkhorst-Pack  $k$ -point mesh of  $9 \times 9 \times 7$ .

The imaginary part of the dielectric function due to direct inter-band transitions is given by the expression:

$$\varepsilon_2(\hbar\omega) = \frac{2e^2\pi}{\Omega\varepsilon_0} \sum_{k,v,c} \left| \langle \psi_k^c | u \cdot r | \psi_k^v \rangle \right|^2 \delta(E_k^c - E_k^v - E) \dots\dots\dots (1)$$

where  $\Omega$ ,  $\omega$ ,  $u$ ,  $v$  and  $c$  are the unit-cell volume, photon frequencies, the vector defining the polarization of the incident electric field, valence and conduction bands, respectively. The real part of the dielectric function is obtained from  $\varepsilon_2$  by a Kramers-Kronig transformation:

$$\varepsilon_1(\omega) = 1 + \left(\frac{2}{\pi}\right) \int_0^{+\infty} d\omega' \frac{\omega'^2 \varepsilon_2(\omega')}{\omega'^2 - \omega^2} \dots\dots\dots (2)$$

The refractive index  $n(\omega)$  can be obtained based on  $\varepsilon_1$  and  $\varepsilon_2$ .

In calculation of the static  $\chi^{(2)}$  coefficients, the so-called length-gauge formalism<sup>12</sup> derived by Aversa and Sipe<sup>13</sup> and modified by Rashkeev et al<sup>14</sup> is adopted, which has proven to be successful in calculating the second order susceptibility for semiconductors and insulators. In the static case, the imaginary part of the static second-order optical susceptibility can be expressed as:

$$\begin{aligned} & \chi^{abc} \\ &= \frac{e^3}{\hbar^2\Omega} \sum_{nml,k} \frac{r_{nm}^a (r_{ml}^b r_{ln}^c + r_{ml}^c r_{ln}^b)}{2\omega_{nm} \omega_{ml} \omega_{ln}} [\omega_n f_{ml} + \omega_m f_{ln} + \omega_l f_{nm}] \\ &+ \frac{ie^3}{4\hbar^2\Omega} \sum_{nm,k} \frac{f_{nm}}{\omega_{mn}^2} [r_{nm}^a (r_{mn;c}^b + r_{mn;b}^c) + r_{nm}^b (r_{mn;c}^a + r_{mn;a}^c) + r_{nm}^c (r_{mn;b}^a + r_{mn;a}^b)] \\ &\dots\dots\dots(3) \end{aligned}$$

## Electronic Supplementary Information (ESI)

where  $r$  is the position operator,  $\hbar\omega_{nm} = \hbar\omega_n - \hbar\omega_m$  is the energy difference for the bands  $m$  and  $n$ ,  $f_{mn} = f_m - f_n$  is the difference of the Fermi distribution functions, subscripts  $a$ ,  $b$ , and  $c$  are Cartesian indices, and  $r_{mn;a}^b$  is the so-called generalized derivative of the coordinate operator in  $k$  space,

$$r_{nm;a}^b = \frac{r_{nm}^a \Delta_{mn}^b + r_{nm}^b \Delta_{mn}^a}{\omega_{nm}} + \frac{i}{\omega_{nm}} \times \sum_l (\omega_{lm} r_{nl}^a r_{lm}^b - \omega_{nl} r_{nl}^b r_{lm}^a) \dots\dots\dots (4)$$

where  $\Delta_{nm}^a = (p_{nn}^a - p_{mm}^a) / m$  is the difference between the electronic velocities at the bands  $n$  and  $m$ .

As the nonlinear optical coefficients is sensitive to the momentum matrix, much finer k-point grid and large amount of empty bands are required to obtain a convergent  $\chi^{(2)}$  coefficient. The  $\chi^{(2)}$  coefficients here were calculated from PBE wave functions and a scissor operator has been added to correct the conduction band energy (corrected to the experimental gap), which has proven to be reliable in predicting the second order susceptibility for semiconductors and insulators.



# Electronic Supplementary Information (ESI)

## 3 Figures and Tables

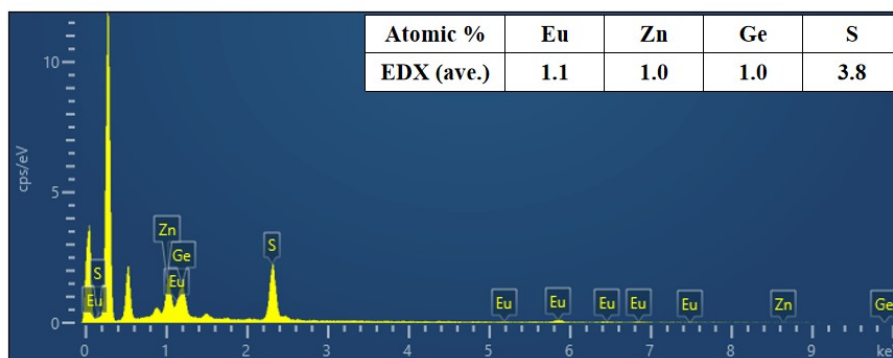

Figure S1. EDX results of  $\beta$ -EuZnGeS<sub>4</sub>.

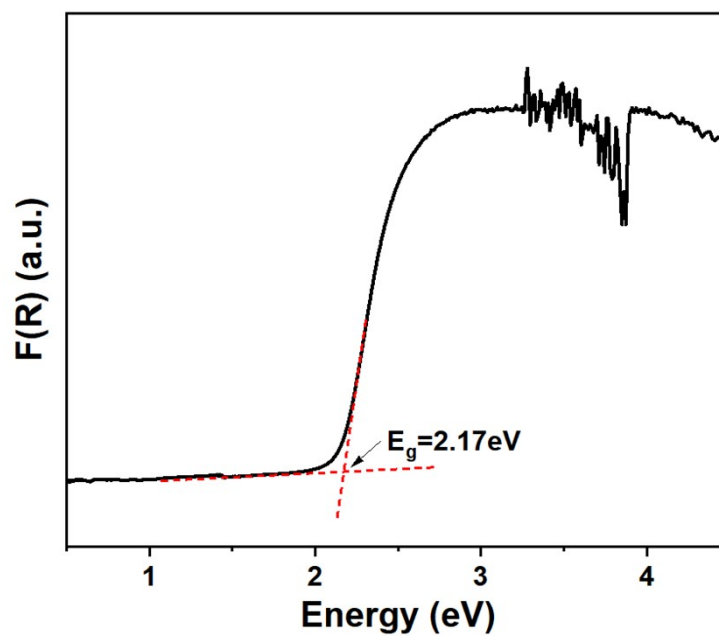

Figure S2. UV-vis-NIR diffuse reflectance spectrum of Eu<sub>2</sub>GeS<sub>4</sub>.

## Electronic Supplementary Information (ESI)

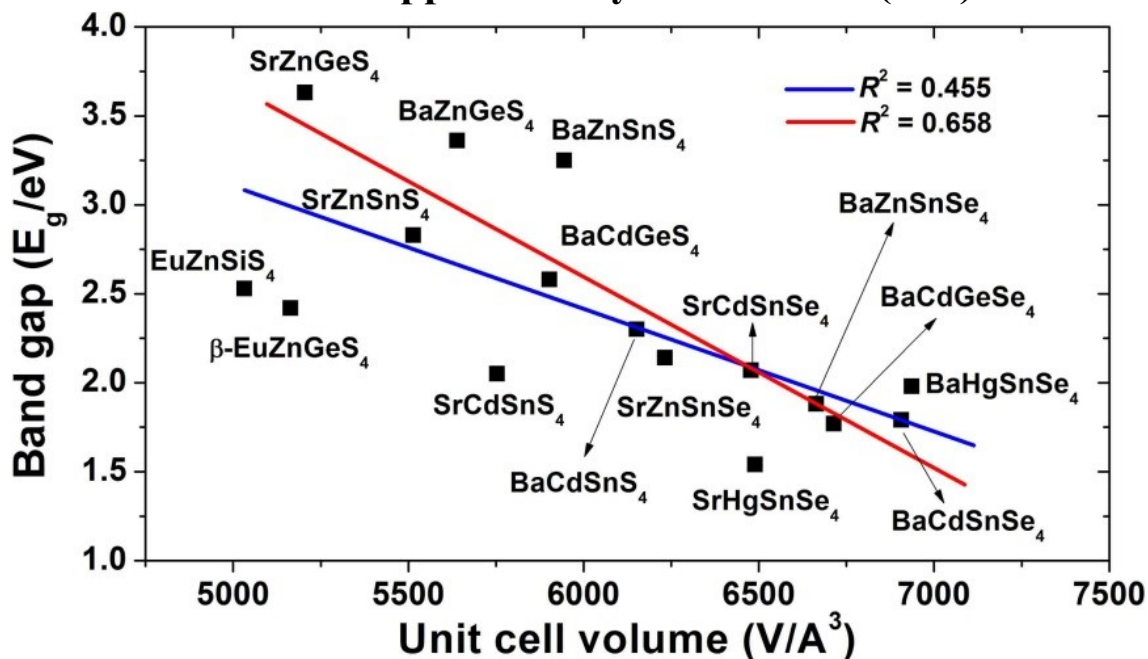

**Figure S3.** Plot of band gap energies in eV as a function of cell volumes in  $\text{\AA}^3$  for the members of the  $X^{II}\text{-}M^{II}\text{-}M^{IV}\text{-}Q_4$  family with the space group  $Fdd2$ .

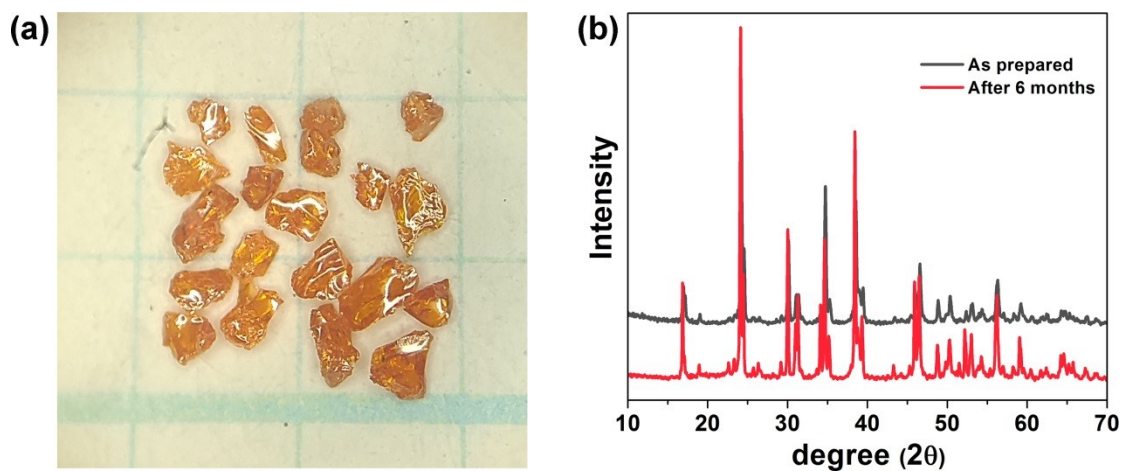

**Figure S4.** Crystal photo and powder XRD data of the  $\beta\text{-EuZnGeS}_4$  compound stored for over 6 months.

## Electronic Supplementary Information (ESI)

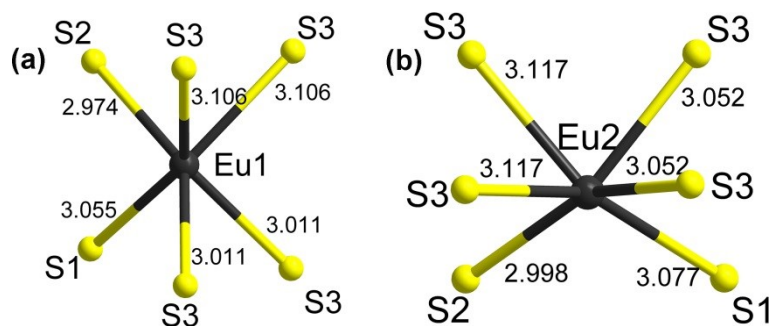

**Figure S5.** Coordination environment of (a) Eu1 and (b) Eu2 in ternary  $\text{Eu}_2\text{GeS}_4$ .

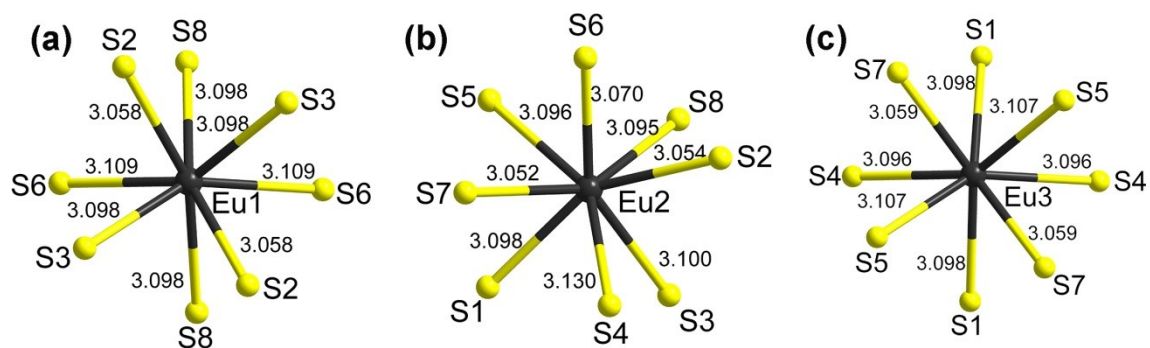

**Figure S6.** Coordination environment of (a) Eu1, (b) Eu2 and (c) Eu3 in quaternary  $\beta\text{-EuZnGeS}_4$ .

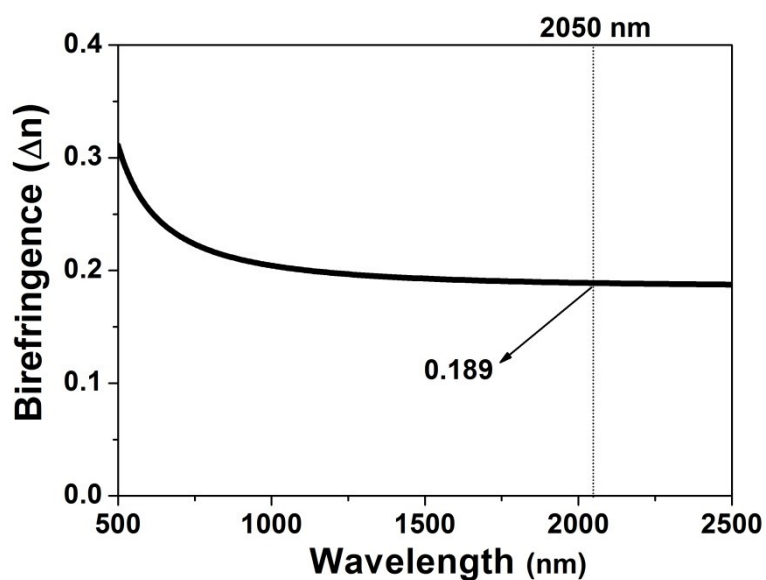

**Figure S7.** Calculated birefringence ( $\Delta n$ ) of  $\beta\text{-EuZnGeS}_4$ .

## Electronic Supplementary Information (ESI)

**Table S1.** Crystal data and structural refinement details for  $\beta$ -EuZnGeS<sub>4</sub>.

---

|                                                        |                                  |
|--------------------------------------------------------|----------------------------------|
| Empirical formula                                      | $\beta$ -EuZnGeS <sub>4</sub>    |
| Formula weight                                         | 418.16                           |
| Temperature/K                                          | 250 (2)                          |
| Crystal system                                         | Orthorhombic                     |
| Space group                                            | <i>Fdd2</i>                      |
| <i>a</i> /Å                                            | 20.6941(8)                       |
| <i>b</i> /Å                                            | 20.4059(6)                       |
| <i>c</i> /Å                                            | 12.2283(4)                       |
| $\alpha$ /°                                            | 90                               |
| $\beta$ /°                                             | 90                               |
| $\gamma$ /°                                            | 90                               |
| Volume/Å <sup>3</sup>                                  | 5163.8(3)                        |
| <i>Z</i>                                               | 32                               |
| $\rho_{\text{calc}}$ g/cm <sup>3</sup>                 | 4.30                             |
| $\mu$ /mm <sup>-1</sup>                                | 19.1                             |
| Goodness-of-fit on F <sup>2</sup>                      | 1.083                            |
| Final R indexes [ <i>I</i> >= 2 $\sigma$ ( <i>I</i> )] | $R_1 = 0.0187$ , $wR_2 = 0.0450$ |
| Final R indexes [all data]                             | $R_1 = 0.0263$ , $wR_2 = 0.0474$ |
| Largest diff. peak/hole / e Å <sup>-3</sup>            | 0.64/-0.77                       |
| Flack parameter                                        | -0.022(13)                       |

<sup>a</sup>:  $R_1 = \Sigma||F_o| - |F_c||/\Sigma|F_o|$ ,  $wR_2 = [\Sigma w(F_o^2 - F_c^2)^2/\Sigma w(F_o^2)^2]^{1/2}$

---

## Electronic Supplementary Information (ESI)

**Table S2.** Atomic coordinates, equivalent isotropic displacement parameters and bond valence sums (BVS) for of  $\beta$ -EuZnGeS<sub>4</sub>.

| Atom | Wyckff | x           | y           | z           | $U_{\text{eq}}$ (Å) <sup>a</sup> | BVS* |
|------|--------|-------------|-------------|-------------|----------------------------------|------|
| Eu1  | 8a     | 0.75        | 0.25        | 0.89018(12) | 0.0109(2)                        | 2.04 |
| Eu2  | 16b    | 0.50182(2)  | 0.24850(4)  | 0.89260(10) | 0.0104(2)                        | 2.06 |
| Eu3  | 8a     | 0.75        | 0.25        | 0.39447(11) | 0.0107(2)                        | 2.04 |
| Zn1  | 16b    | 0.62463(9)  | 0.32375(6)  | 0.10610(10) | 0.0130(3)                        | 1.88 |
| Zn2  | 16b    | 0.62585(9)  | 0.36206(6)  | 0.63913(11) | 0.0125(3)                        | 1.91 |
| Ge1  | 16b    | 0.62476(7)  | 0.38716(5)  | 0.39133(9)  | 0.0085(2)                        | 4.00 |
| Ge2  | 16b    | 0.62490(8)  | 0.18157(5)  | 0.68289(8)  | 0.0084(3)                        | 4.03 |
| S1   | 16b    | 0.6235(2)   | 0.20508(13) | 0.5074(2)   | 0.0094(6)                        | 2.01 |
| S2   | 16b    | 0.6252(2)   | 0.27880(12) | 0.7652(2)   | 0.0106(6)                        | 2.12 |
| S3   | 16b    | 0.70874(18) | 0.12891(16) | 0.7543(3)   | 0.0103(8)                        | 2.47 |
| S4   | 16b    | 0.70854(19) | 0.37987(16) | 0.5049(3)   | 0.0102(8)                        | 1.90 |
| S5   | 16b    | 0.54225(19) | 0.37912(17) | 0.5075(3)   | 0.0103(8)                        | 1.92 |
| S6   | 16b    | 0.54166(18) | 0.12869(16) | 0.7566(3)   | 0.0092(8)                        | 1.94 |
| S7   | 16b    | 0.6244(2)   | 0.29685(13) | 0.2881(2)   | 0.0093(6)                        | 2.10 |
| S8   | 16b    | 0.6235(2)   | 0.46787(12) | 0.2728(2)   | 0.0102(6)                        | 2.02 |

$U_{\text{eq}}$  is defined as one third of the trace of the orthogonalized  $U_{ij}$  tensor.

\*The BVS was calculated by using empirical formula  $V_i = \sum S_{ij} = \sum \exp[(r_0 - r_{ij})/0.37]$ ,

where  $S_{ij}$  is the bond valence associated with bond length  $r_{ij}$ , and  $r_0$ .

## Electronic Supplementary Information (ESI)

**Table S3.** Selected bond lengths (Å) and angle (°) of  $\beta$ -EuZnGeS<sub>4</sub>.

|                      |           |                      |           |
|----------------------|-----------|----------------------|-----------|
| Eu1–S2×2             | 3.058(4)  | Zn1–S7               | 2.292(3)  |
| Eu1–S8×3             | 3.098(4)  | Zn1–S8×2             | 2.389(3)  |
| Eu1–S3×2             | 3.098(3)  | Zn1–S6×2             | 2.396(4)  |
| Eu1–S6×2             | 3.109(3)  | Zn1–S3×2             | 2.407(4)  |
| Eu2–S7×2             | 3.053(4)  | Zn2–S2               | 2.294(3)  |
| Eu2–S2               | 3.054(4)  | Zn2–S1×2             | 2.386(3)  |
| Eu2–S6               | 3.070(3)  | Zn2–S5               | 2.388(4)  |
| Eu2–S8×2             | 3.095(4)  | Zn2–S4               | 2.399(4)  |
| Eu2–S5×2             | 3.096(3)  | Ge1–S8               | 2.194(3)  |
| Eu2–S1×2             | 3.098(4)  | Ge1–S4               | 2.226(4)  |
| Eu2–S3×2             | 3.100(3)  | Ge1–S5               | 2.227(4)  |
| Eu2–S4×2             | 3.130(3)  | Ge1–S7               | 2.234(3)  |
| Eu3–S7×2             | 3.059(4)  | Ge2–S1               | 2.199(3)  |
| Eu3–S4×2             | 3.096(3)  | Ge2–S3               | 2.220(4)  |
| Eu3–S1×2             | 3.098(4)  | Ge2–S6               | 2.223(4)  |
| Eu3–S5×2             | 3.107(3)  | Ge2–S2               | 2.225(2)  |
| $\angle$ S2–Eu1–S8×2 | 66.76(7)  | $\angle$ S7–Eu3–S4×2 | 133.51(9) |
| $\angle$ S2–Eu1–S8×2 | 156.64(5) | $\angle$ S7–Eu3–S1×2 | 64.18(6)  |
| $\angle$ S2–Eu1–S3×2 | 79.13(10) | $\angle$ S7–Eu3–S1×2 | 144.56(5) |
| $\angle$ S2–Eu1–S3×2 | 69.66(8)  | $\angle$ S4–Eu3–S1×2 | 77.67(10) |
| $\angle$ S8–Eu1–S3×2 | 132.62(9) | $\angle$ S4–Eu3–S1×2 | 79.91(9)  |
| $\angle$ S8–Eu1–S3×2 | 83.38(8)  | $\angle$ S7–Eu3–S5   | 76.21(10) |
| $\angle$ S2–Eu1–S6×2 | 128.70(9) | $\angle$ S7–Eu3–S5   | 77.28(9)  |

## Electronic Supplementary Information (ESI)

---

|                             |            |                    |            |
|-----------------------------|------------|--------------------|------------|
| $\angle S2-Eu1-S6 \times 2$ | 80.35(8)   | $\angle S4-Eu3-S5$ | 68.50(10)  |
| $\angle S8-Eu1-S6 \times 2$ | 79.06(10)  | $\angle S4-Eu3-S5$ | 146.80(6)  |
| $\angle S8-Eu1-S6 \times 2$ | 73.16(9)   | $\angle S1-Eu3-S5$ | 76.56(8)   |
| $\angle S3-Eu1-S6 \times 2$ | 147.46(5)  | $\angle S1-Eu3-S5$ | 135.47(9)  |
| $\angle S3-Eu1-S6 \times 2$ | 69.40(10)  | $\angle S7-Eu3-S5$ | 77.28(9)   |
| $\angle S7-Eu2-S2$          | 124.28(10) | $\angle S7-Eu3-S5$ | 76.21(10)  |
| $\angle S7-Eu2-S6$          | 76.20(10)  | $\angle S4-Eu3-S5$ | 68.50(10)  |
| $\angle S2-Eu2-S6$          | 70.14(8)   | $\angle S4-Eu3-S5$ | 146.80(6)  |
| $\angle S7-Eu2-S8$          | 150.18(8)  | $\angle S1-Eu3-S5$ | 76.56(8)   |
| $\angle S2-Eu2-S8$          | 66.84(7)   | $\angle S1-Eu3-S5$ | 135.47(9)  |
| $\angle S6-Eu2-S8$          | 83.92(8)   | $\angle S7-Zn1-S8$ | 101.38(9)  |
| $\angle S7-Eu2-S5$          | 71.52(8)   | $\angle S7-Zn1-S6$ | 127.34(15) |
| $\angle S2-Eu2-S5$          | 130.39(10) | $\angle S8-Zn1-S6$ | 101.25(14) |
| $\angle S6-Eu2-S5$          | 69.83(11)  | $\angle S7-Zn1-S3$ | 127.81(15) |
| $\angle S8-Eu2-S5$          | 80.92(10)  | $\angle S8-Zn1-S3$ | 102.35(13) |
| $\angle S7-Eu2-S1$          | 64.26(6)   | $\angle S6-Zn1-S3$ | 92.10(9)   |
| $\angle S2-Eu2-S1$          | 150.36(7)  | $\angle S2-Zn2-S1$ | 100.49(11) |
| $\angle S6-Eu2-S1$          | 135.56(10) | $\angle S2-Zn2-S5$ | 123.81(14) |
| $\angle S8-Eu2-S1$          | 121.77(10) | $\angle S1-Zn2-S5$ | 107.24(13) |
| $\angle S5-Eu2-S1$          | 78.75(9)   | $\angle S2-Zn2-S4$ | 125.19(14) |
| $\angle S7-Eu2-S3$          | 132.07(10) | $\angle S1-Zn2-S4$ | 106.87(13) |

---

## Electronic Supplementary Information (ESI)

---

|                               |            |                    |            |
|-------------------------------|------------|--------------------|------------|
| $\angle$ S2–Eu2–S3            | 80.26(8)   | $\angle$ S5–Zn2–S4 | 91.92(11)  |
| $\angle$ S6–Eu2–S3            | 148.38(6)  | $\angle$ S8–Ge1–S4 | 118.12(14) |
| $\angle$ S8–Eu2–S3            | 74.18(9)   | $\angle$ S8–Ge1–S5 | 117.88(14) |
| $\angle$ S5–Eu2–S3            | 126.84(12) | $\angle$ S4–Ge1–S5 | 101.20(12) |
| $\angle$ S1–Eu2–S3            | 76.02(10)  | $\angle$ S8–Ge1–S7 | 104.23(11) |
| $\angle$ S7–Eu2–S4            | 76.72(9)   | $\angle$ S4–Ge1–S7 | 107.45(13) |
| $\angle$ S2–Eu2–S4            | 78.71(10)  | $\angle$ S5–Ge1–S7 | 107.31(13) |
| $\angle$ S6–Eu2–S4            | 114.64(11) | $\angle$ S1–Ge2–S3 | 119.96(15) |
| $\angle$ S8–Eu2–S4            | 132.47(10) | $\angle$ S1–Ge2–S6 | 119.42(15) |
| $\angle$ S5–Eu2–S4            | 145.77(6)  | $\angle$ S3–Ge2–S6 | 102.20(10) |
| $\angle$ S1–Eu2–S4            | 76.21(9)   | $\angle$ S1–Ge2–S2 | 104.30(9)  |
| $\angle$ S3–Eu2–S4            | 68.38(11)  | $\angle$ S3–Ge2–S2 | 104.59(15) |
| $\angle$ S7–Eu3–S4 $\times$ 2 | 71.50(8)   | $\angle$ S6–Ge2–S2 | 104.56(14) |

---



## Electronic Supplementary Information (ESI)

**Table S4.** The  $\Delta d$  (Å) and  $\Delta\theta$  (deg) for the  $X^{II}\text{-M}^{II}\text{-M}^{IV}\text{-Q}_4$  ( $X^{II}$  = Eu, Sr, Ba;  $M^{II}$  = Zn, Cd, Hg;  $M^{IV}$  = Si, Ge, Sn; Q = S, Se) family.

| Number   | Compound                                      | Space group        | $\Delta d$ (Å) | $\Delta\theta$ (deg) | Ref.             |
|----------|-----------------------------------------------|--------------------|----------------|----------------------|------------------|
| 1        | BaZnSiSe <sub>4</sub>                         | <i>Ama2</i>        | 0.04           | 19.49                | 15               |
| 2        | BaZnGeSe <sub>4</sub>                         | <i>Ama2</i>        | 0.06           | 19.65                | 15               |
| 3        | SrZnGeS <sub>4</sub>                          | <i>Fdd2</i>        | 0.07           | 25.96                | 16               |
| 4        | SrZnSnSe <sub>4</sub>                         | <i>Fdd2</i>        | 0.07           | 23.85                | 17               |
| 5        | BaZnSnS <sub>4</sub>                          | <i>Fdd2</i>        | 0.08           | 26.02                | 18               |
| 6        | SrZnSnS <sub>4</sub>                          | <i>Fdd2</i>        | 0.08           | 26.75                | 19               |
| 7        | BaZnSnSe <sub>4</sub>                         | <i>Fdd2</i>        | 0.08           | 23.73                | 18               |
| <b>8</b> | <b><math>\beta</math>-EuZnGeS<sub>4</sub></b> | <b><i>Fdd2</i></b> | <b>0.077</b>   | <b>17.15</b>         | <b>This work</b> |
| 9        | EuZnSiS <sub>4</sub>                          | <i>Fdd2</i>        | 0.093          | 24.92                | 20               |
| 10       | SrCdSnS <sub>4</sub>                          | <i>Fdd2</i>        | 0.1            | 28.57                | 21               |
| 11       | SrCdSnSe <sub>4</sub>                         | <i>Fdd2</i>        | 0.1            | 25.95                | 21               |
| 12       | BaCdSnSe <sub>4</sub>                         | <i>Fdd2</i>        | 0.1            | 24.97                | 22               |
| 13       | BaCdSnS <sub>4</sub>                          | <i>Fdd2</i>        | 0.1            | 27.41                | 23               |
| 14       | BaCdGeSe <sub>4</sub>                         | <i>Fdd2</i>        | 0.11           | 27.74                | 24               |
| 15       | BaCdGeS <sub>4</sub>                          | <i>Fdd2</i>        | 0.16           | 31.34                | 25               |
| 16       | SrHgSnSe <sub>4</sub>                         | <i>Fdd2</i>        | 0.16           | 15.9                 | 26               |
| 17       | BaHgSnSe <sub>4</sub>                         | <i>Fdd2</i>        | 0.16           | 16.8                 | 26               |
| 18       | SrCdSiS <sub>4</sub>                          | <i>Ama2</i>        | 0.13           | 31.61                | 27               |
| 19       | SrCdGeSe <sub>4</sub>                         | <i>Ama2</i>        | 0.16           | 32.3                 | 28               |
| 20       | SrCdGeS <sub>4</sub>                          | <i>Ama2</i>        | 0.17           | 36.85                | 28               |
| 21       | SrHgGeSe <sub>4</sub>                         | <i>Ama2</i>        | 0.18           | 29.27                | 29               |

## Electronic Supplementary Information (ESI)

|    |                                |             |        |        |    |
|----|--------------------------------|-------------|--------|--------|----|
| 22 | BaHgGeSe <sub>4</sub>          | <i>Ama2</i> | 0.19   | 28.73  | 29 |
| 23 | SrZnSiSe <sub>4</sub>          | <i>Ama2</i> | 0.22   | 30.15  | 30 |
| 24 | SrHgSiS <sub>4</sub>           | <i>Ama2</i> | 0.26   | 45.23  | 31 |
| 25 | SrHgGeS <sub>4</sub>           | <i>Ama2</i> | 0.26   | 38.27  | 31 |
| 26 | SrHgSnS <sub>4</sub>           | <i>Ama2</i> | 0.28   | 23.89  | 26 |
| 27 | BaHgSiS <sub>4</sub>           | <i>Ama2</i> | 0.29   | 46.03  | 31 |
| 28 | $\beta$ -BaHgSnS <sub>4</sub>  | <i>Ama2</i> | 0.3    | 24.45  | 26 |
| 29 | BaHgGeS <sub>4</sub>           | <i>Ama2</i> | 0.31   | 38.92  | 31 |
| 30 | EuCdSiS <sub>4</sub>           | <i>Ama2</i> | 0.1718 | 44.314 | 20 |
| 31 | EuCdGeS <sub>4</sub>           | <i>Ama2</i> | 0.172  | 37.11  | 32 |
| 32 | EuCdGeSe <sub>4</sub>          | <i>Ama2</i> | 0.175  | 32.27  | 32 |
| 33 | EuHgGeSe <sub>4</sub>          | <i>Ama2</i> | 0.221  | 34.43  | 33 |
| 34 | EuHgGeS <sub>4</sub>           | <i>Ama2</i> | 0.248  | 38.983 | 34 |
| 35 | EuHgSnS <sub>4</sub>           | <i>Ama2</i> | 0.282  | 23.87  | 33 |
| 36 | $\alpha$ -BaHgSnS <sub>4</sub> | <i>Pnn2</i> | 0.27   | 25.258 | 35 |

## Electronic Supplementary Information (ESI)

### 4 References

- 1 P. Kubelka and F. Munk, Reflection characteristics of paints, *Z. Techn. Phys.*, 1931, **12**, 593–601.
2. CrystalClear Version 1.3.5 Rigaku Corp.: Woodlands, TX, 1999.
3. P. Kubelka, Ein beitrag zur optik der farbanstriche, *Z. Tech. Phys.*, 1931, **12**, 593–601.
4. S. K. Kurtz and T. T. Perry, A powder technique for the evaluation of nonlinear optical materials, *J. Appl. Phys.*, 1968, **39**, 3798–3813.
5. M. J. Zhang, X. M. Jiang, L. J. Zhou and G. C. Guo, Two phases of Ga<sub>2</sub>S<sub>3</sub>: promising infrared second-order nonlinear optical materials with very high laser induced damage thresholds, *J. Mater. Chem. C*, 2013, **1**, 4754–4760.
6. G. Kresse, VASP, 5.3.5 <http://cms.mpi.univie.ac.at/vasp/vasp/vasp.html>.
7. G. Kresse and J. Furthmuller, Efficient iterative schemes for ab initio total-energy calculations using a plane-wave basis set, *Phys. Rev. B: Condens. Matter*, 1996, 11169–11186.
8. G. Kresse and D. Joubert, From ultrasoft pseudopotentials to the projector augmented-wave method, *Phys. Rev. B: Condens. Matter*, 1999, **59**, 1758–1775.
9. Blochl, P. E. Projector augmented-wave method, *Phys. Rev. B: Condens. Matter*, 1994, **50**, 17953–17979.
- 10 J. P. Perdew, K. Burke and M. Ernzerhof, Generalized gradient approximation made simple, *Phys. Rev. Lett.*, 1996, **77**, 3865–3868.
11. D. J. Chadi, Special points for Brillouin-zone integrations, *Phys. Rev. B: Condens. Matter*, 1978, **16**, 1746–1747.

## Electronic Supplementary Information (ESI)

12. Z. Fang, J. Lin, R. Liu, P. Liu, Y. Li, X. Huang, K. Ding, L. Ning and Y. Zhang, Computational design of inorganic nonlinear optical crystals based on a genetic algorithm, *CrystEngComm.*, 2014, **16**, 10569–10580.
13. C. Aversa and J. E. Sipe, Nonlinear optical susceptibilities of semiconductors: Results with a length-gauge analysis, *Phys. Rev. B*, 1995, **52**, 14636–14645.
14. S. N. Rashkeev, W. R. L. Lambrecht and B. Segall, Efficient ab initio method for the calculation of frequency-dependent second-order optical response in semiconductors, *Phys. Rev. B*, 1998, **57**, 3905–3919.
15. W. L. Yin, A. K. Iyer, C. Li, J. Y. Yao and A. Mar, Noncentrosymmetric chalcogenides BaZnSiSe<sub>4</sub> and BaZnGeSe<sub>4</sub> featuring one-dimensional structures, *J. Alloys Compd.*, 2017, **708**, 414.
16. Q. Q. Liu, X. Liu, L. M. Wu and L. Chen, SrZnGeS<sub>4</sub>: A Dual-Waveband Nonlinear Optical Material with a Transparency Spanning UV/Vis and Far-IR Spectral Regions, *Angew. Chem. Int. Ed.*, 2022, **61**, e202205587.
17. (a) F. Hou, D. Mei, Y. Zhang, F. Liang, J. Wang, J. Lu, Z. Lin and Y. Wu, SrZnSnSe<sub>4</sub>: A quaternary selenide with large second harmonic generation and birefringence, *J. Alloys Compd.*, 2022, **904**, 163944. (b) X. Pang, R. Q. Wang, X. L. Che and F. Q. Huang, SrZnSnSe<sub>4</sub>: Synthesis, crystal structure and nonlinear optical properties, *J. Solid State Chem.*, 2021, **297**, 122092.
18. Y. N. Li, Z. X. Chen, W. D. Yao, R. L. Tang and S. P. Guo, Heterovalent cations substitution to design asymmetric chalcogenides with promising nonlinear optical performances, *J. Mater. Chem. C*, 2021, **9**, 8659.
19. Y. L. Zhang, D. J. Mei, Y. Yang, W. Z. Cao, Y. D. Wu, J. Lu and Z. S. Lin, Rational design of a new chalcogenide with good infrared nonlinear optical performance: SrZnSnS<sub>4</sub>, *J. Mater. Chem. C*, 2019, **7**, 8556.

## Electronic Supplementary Information (ESI)

20. P. Feng, S.-H. Zhou, B.-X. Li, J.-X. Zhang, M.-Y. Ran, X.-T. Wu, H. Lin and Q.-L. Zhu, Realizing Excellent Infrared Nonlinear Optical Performance in Eu-Based Chalcogenides via Rational Cross Substitution Strategy, *ACS Appl. Mater. Interfaces*, 2024, **16**, 52682.
21. Y.-J. Lin, B.-W. Liu, R. Ye, X.-M. Jiang, L.-Q. Yang, H.-Y. Zeng and G.-C. Guo, SrCdSnQ<sub>4</sub> (Q = S and Se): infrared nonlinear optical chalcogenides with mixed NLO-active and synergetic distorted motifs, *J. Mater. Chem. C*, 2019, **7**, 4459.
22. K. Wu, X. Su, Z. H. Yang and S. L. Pan, An investigation of new infrared nonlinear optical material: BaCdSnSe<sub>4</sub>, and three new related centrosymmetric compounds: Ba<sub>2</sub>SnSe<sub>4</sub>, Mg<sub>2</sub>GeSe<sub>4</sub>, and Ba<sub>2</sub>Ge<sub>2</sub>S<sub>6</sub>, *Dalton Trans.*, 2015, **44**, 19856.
23. N. Zhen, K. Wu, Y. Wang, Q. Li, W. H. Gao, D. W. Hou, Z. H. Yang, H. D. Jiang, Y. J. Dong and S. L. Pan, BaCdSnS<sub>4</sub> and Ba<sub>3</sub>CdSn<sub>2</sub>S<sub>8</sub>: syntheses, structures, and nonlinear optical and photoluminescence properties, *Dalton Trans.*, 2016, **45**, 10681.
24. F. Y. Yuan, C. S. Lin, Y. Z. Huang, H. Zhang, A. Y. Zhou, G. L. Chai and W. D. Cheng, BaCdGeSe<sub>4</sub>: Synthesis, structure and nonlinear optical properties, *J. Solid State Chem.*, 2021, **302**, 122352.
25. Y.-J. Lin, R. Ye, L.-Q. Yang, X.-M. Jiang, B.-W. Liu, H.-Y. Zeng and G.-C. Guo, BaMnSnS<sub>4</sub> and BaCdGeS<sub>4</sub>: infrared nonlinear optical sulfides containing highly distorted motifs with centers of moderate electronegativity, *Inorg. Chem. Front.*, 2019, **6**, 2365.
26. Y. W. Guo, F. Liang, Z. Li, W. H. Xing, Z. S. Lin, J. Y. Yao, A. Mar and Y. C. Wu, AHgSnQ<sub>4</sub> (A = Sr, Ba; Q = S, Se): A Series of Hg-Based Infrared Nonlinear-Optical Materials with Strong Second-Harmonic-Generation Response and Good Phase Matchability, *Inorg. Chem.* 2019, **58**, 10390.

## Electronic Supplementary Information (ESI)

27. H.-D. Yang, M.-Y. Ran, S.-H. Zhou, X.-T. Wu, H. Lin and Q.-L. Zhu, Rational design via dual-site aliovalent substitution leads to an outstanding IR nonlinear optical material with well-balanced comprehensive properties, *Chem. Sci.*, 2022, **13**, 10725.
28. Y. W. Dou, Y. Chen, Z. Li, A. K. Iyer, B. Kang, W. L. Yin, J. Y. Yao and A. Mar, SrCdGeS<sub>4</sub> and SrCdGeSe<sub>4</sub>: Promising Infrared Nonlinear Optical Materials with Congruent-Melting Behavior, *Cryst. Growth Des.*, 2019, **19**, 1206.
29. Y. W. Guo, F. Liang, W. L. Yin, Z. Li, X. Y. Luo, Z. S. Lin, J. Y. Yao, A. Mar and Y. C. Wu, BaHgGeSe<sub>4</sub> and SrHgGeSe<sub>4</sub>: Two New Hg-Based Infrared Nonlinear Optical Materials, *Chem. Mater.*, 2019, **31**, 3034.
30. M. J. Ma, J. H. Dang, Y. D. Wu, X. M. Jiang and D. J. Mei, Optimal Design of Mid-Infrared Nonlinear-Optical Crystals: From SrZnSnSe<sub>4</sub> to SrZnSiSe<sub>4</sub>, *Inorg. Chem.*, 2023, **62**, 6549.
31. X. Zhang, H. Wu, Z. Hu, J. Wang, Y. Wu and H. Yu, A<sup>II</sup>HgM<sup>IV</sup>S<sub>4</sub> (A<sup>II</sup> = Sr, Ba, M<sup>IV</sup> = Si, Ge): A Series of Materials with Large Second Harmonic Generation Response and Wide Band Gaps, *Adv. Optical Mater.*, 2023, **12**, 2301735.
32. W. Xing, N. Wang, Y. Guo, Z. Li, J. Tang, K. Kang, W. Yin, Z. Lin, J. Yao and B. Kang, Two rare-earth-based quaternary chalcogenides EuCdGeQ<sub>4</sub> (Q = S, Se) with strong second-harmonic generation, *Dalton Trans.*, 2019, **48**, 17620.
33. W. Xing, C. Tang, N. Wang, C. Li, Z. Li, J. Wu, Z. Lin, J. Yao, W. Yin and B. Kang, EuHgGeSe<sub>4</sub> and EuHgSnS<sub>4</sub>: Two Quaternary Eu-Based Infrared Nonlinear Optical Materials with Strong Second-Harmonic-Generation Responses, *Inorg. Chem.*, 2020, **59**, 18452.
34. M. Yan, Z.-D. Sun, W.-D. Yao, W. Zhou, W. Liu and S.-P. Guo, A highly distorted HgS<sub>4</sub> tetrahedron-induced moderate second-harmonic generation response of EuHgGeS<sub>4</sub>, *Inorg. Chem. Front.*, 2020, **7**, 2451.

## Electronic Supplementary Information (ESI)

35. C. L. Teske, Preparation and crystal-structure of barium-mercury-thiostannate (IV), BaHgSnS<sub>4</sub>, *Z. Naturforsch. B*, 1980, **35**, 7.
